# Supplementary material for: Treatment Patterns of Anxiety and Posttraumatic Stress Disorder Following Traumatic Brain Injury
Source: Atypon-hosted journal article supplement (doi:10.1176/appi.neuropsych.21040104), 2022-01-18
Supplement: appi.neuropsych.21040104.ds001.pdf [file appi.neuropsych.21040104.ds001.pdf]

**SUPPLEMENTAL. Classes of Medications and Prescription Drug Names Coded as Indicated (1) or Not Indicated (0) for the Treatment of Anxiety and PTSD.**

| <i>MEDICATION CLASS</i> | <i>NAME</i>                | <i>ANXIETY</i> | <i>PTSD</i> |
|-------------------------|----------------------------|----------------|-------------|
| ANTICONVULSANTS         | DIVALPROEX                 | 0              | 1           |
|                         | EZOGABINE                  | 0              | 1           |
|                         | FELBAMATE                  | 0              | 1           |
|                         | GABAPENTIN                 | 1              | 1           |
|                         | LACOSAMIDE                 | 0              | 1           |
|                         | LEVETIRACETAM              | 0              | 1           |
|                         | MAGNESIUM                  | 0              | 1           |
|                         | PERAMPANEL                 | 1              | 1           |
|                         | PREGABALIN                 | 1              | 0           |
|                         | RUFINAMIDE                 | 1              | 1           |
|                         | TIAGABINE                  | 1              | 1           |
|                         | TOPIRAMATE                 | 0              | 1           |
|                         | VIGABATRIN                 | 1              | 1           |
|                         | ZONISAMIDE                 | 1              | 1           |
| ANTIDEPRESSANTS         | AMITRIPTYLINE              | 1              | 1           |
|                         | AMOXAPINE                  | 1              | 1           |
|                         | BUPROPION                  | 0              | 1           |
|                         | CITALOPRAM                 | 1              | 1           |
|                         | CLOMIPRAMINE               | 1              | 1           |
|                         | DESIPRAMINE                | 1              | 1           |
|                         | DESVENLAFAXINE             | 1              | 1           |
|                         | DOXEPIN                    | 1              | 1           |
|                         | DULOXETINE                 | 1              | 1           |
|                         | ESCITALOPRAM               | 1              | 1           |
|                         | FLUOXETINE                 | 1              | 1           |
|                         | FLUVOXAMINE                | 1              | 1           |
|                         | IMIPRAMINE                 | 1              | 1           |
|                         | ISOCARBOXAZID              | 0              | 1           |
|                         | LEVOMILNACIPRAN            | 1              | 1           |
|                         | MAPROTILINE                | 1              | 1           |
|                         | MIRTAZAPINE                | 1              | 1           |
|                         | NEFAZODONE                 | 1              | 1           |
|                         | NORTRIPTYLINE              | 1              | 1           |
|                         | PAROXETINE                 | 1              | 1           |
|                         | PERPHENAZINE-AMITRIPTYLINE | 1              | 1           |
|                         | PHENELZINE                 | 0              | 1           |
|                         | PROTRIPTYLINE              | 1              | 1           |
|                         | SERTRALINE                 | 1              | 1           |
|                         | TRANYLCYPROMINE            | 1              | 1           |
|                         | TRAZODONE                  | 1              | 1           |
|                         | TRIMIPRAMINE               | 1              | 1           |
|                         | VENLAFAXINE                | 1              | 1           |

|                                          |                         |   |   |
|------------------------------------------|-------------------------|---|---|
|                                          | VILAZODONE              | 1 | 1 |
|                                          | VORTIOXETINE            | 1 | 1 |
| ANTIPSYCHOTICS                           | ARIPIRAZOLE             | 0 | 1 |
|                                          | ASENAPINE               | 0 | 1 |
|                                          | BREXPIRAZOLE            | 0 | 1 |
|                                          | CHLORPROMAZINE          | 0 | 1 |
|                                          | CLOZAPINE               | 0 | 1 |
|                                          | FLUPHENAZINE            | 0 | 1 |
|                                          | HALOPERIDOL             | 0 | 1 |
|                                          | ILOPERIDONE             | 0 | 1 |
|                                          | LOXAPINE                | 0 | 1 |
|                                          | LURASIDONE              | 0 | 1 |
|                                          | MOLINDONE               | 0 | 1 |
|                                          | OLANZAPINE              | 1 | 1 |
|                                          | OLANZAPINE/FLUOXETINE   | 1 | 1 |
|                                          | PALIPERIDONE            | 0 | 1 |
|                                          | PERPHENAZINE            | 0 | 1 |
|                                          | PIMOZIDE                | 1 | 1 |
|                                          | QUETIAPINE              | 1 | 1 |
|                                          | RISPERIDONE             | 1 | 1 |
|                                          | THIORIDAZINE            | 0 | 1 |
|                                          | THIOTHIXENE             | 0 | 1 |
| TRIFLUOPERAZINE                          | 1                       | 1 |   |
| ZIPRASIDONE                              | 1                       | 1 |   |
| ANXIOLYTICS                              | BUSPIRONE               | 1 | 1 |
|                                          | HYDROXYZINE             | 1 | 0 |
|                                          | MEPROBAMATE             | 1 | 0 |
|                                          | RAMELTEON               | 0 | 1 |
|                                          | SUVOREXANT              | 0 | 1 |
| SHORT ACTING<br>BENZODIAZEPINE           | CLORAZEPATE DIPOTASSIUM | 1 | 0 |
|                                          | HALCION                 | 0 | 0 |
|                                          | MIDAZOLAM               | 0 | 0 |
|                                          | TRANXENE SD             | 1 | 0 |
| INTERMEDIATE<br>ACTING<br>BENZODIAZEPINE | ALPRAZOLAM              | 1 | 0 |
|                                          | ATIVAN                  | 1 | 0 |
|                                          | GABAZOLAMINE            | 1 | 0 |
|                                          | OXAZEPAM                | 1 | 0 |
|                                          | RESTORIL                | 0 | 0 |
| LONG ACTING<br>BENZODIAZEPINE            | ALPRAZOLAM ER/XR        | 1 | 0 |
|                                          | A-POXIDE                | 1 | 0 |
|                                          | CHLOR POX               | 1 | 0 |
|                                          | CHLORDIAZEPOXIDE        | 1 | 0 |
|                                          | DALMANE                 | 0 | 0 |
|                                          | DIAZEPAM                | 1 | 0 |
|                                          | ESTAZOLAM               | 0 | 0 |

|                   |                    |   |   |
|-------------------|--------------------|---|---|
|                   | FLURAZEPAM         | 0 | 0 |
|                   | J-TRAN             | 0 | 0 |
|                   | LIBRAX             | 0 | 0 |
|                   | LIBRITABS          | 0 | 0 |
|                   | ESTAZOLAM          | 0 | 0 |
|                   | LIBRIUM            | 1 | 0 |
|                   | PAXIPAM            | 1 | 0 |
|                   | Q-PAM              | 0 | 0 |
|                   | QUAZEPAM           | 0 | 0 |
|                   | VALIUM             | 1 | 0 |
|                   | VALRELEASE         | 0 | 0 |
|                   | XANAX XR           | 1 | 0 |
|                   | CARBAMAZEPINE      | 0 | 1 |
|                   | ESLICARBAZEPINE    | 0 | 1 |
|                   | LAMOTRIGINE        | 0 | 1 |
| MOOD STABILIZER   | LITHIUM            | 0 | 1 |
|                   | OXCARBAZEPINE      | 0 | 1 |
|                   | VALPROATE          | 0 | 1 |
|                   | VALPROIC           | 0 | 1 |
|                   | CHLORAL            | 0 | 1 |
|                   | DICHLORALPHENAZONE | 0 | 1 |
|                   | DROPERIDOL         | 0 | 1 |
| SEDATIVE HYPNOTIC | ESZOPICLONE        | 0 | 1 |
|                   | TASIMELTEON        | 0 | 1 |
|                   | ZALEPLON           | 0 | 1 |
|                   | ZOLPIDEM           | 0 | 1 |
